# Supplementary material
Source: PubMed Central journal article supplement (PMC2680727)
Supplement: NIHMS86390-supplement-4_si_004.pdf [file NIHMS86390-supplement-4_si_004.pdf]

Table S1

| <b>Elemental Composition</b> | <b>Calculated Mass</b> | <b>ppm Error</b> |
|------------------------------|------------------------|------------------|
| $C_{56}H_{81}O_6S_1^-$       | 881.5759               | 0.5              |
| $C_{50}H_{82}N_4O_5P_1S_1^-$ | 881.5749               | -0.6             |
| $C_{49}H_{86}O_9P_1S_1^-$    | 881.5736               | -2.2             |
| $C_{51}H_{77}N_6O_4S_1^-$    | 881.5732               | -2.6             |
