# Supplementary material
Source: PubMed Central journal article supplement (PMC2680727)
Supplement: NIHMS86390-supplement-5_si_005.pdf [file NIHMS86390-supplement-5_si_005.pdf]

Table S2

| Measured S881<br>Fragment Mass | Assigned Elemental<br>Composition                                          | Theoretical Exact Mass |
|--------------------------------|----------------------------------------------------------------------------|------------------------|
| 79.95                          | SO <sub>3</sub>                                                            | 79.95                  |
| 96.96                          | HSO <sub>4</sub> <sup>-</sup>                                              | 96.96                  |
| 163.00                         | C <sub>5</sub> H <sub>7</sub> O <sub>4</sub> S <sub>1</sub> <sup>-</sup>   | 163.00                 |
| 172.05                         | C <sub>11</sub> H <sub>8</sub> O <sub>2</sub> <sup>-</sup>                 | 172.05                 |
| 185.06                         | C <sub>12</sub> H <sub>9</sub> O <sub>2</sub> <sup>-</sup>                 | 185.06                 |
| 231.07                         | C <sub>10</sub> H <sub>15</sub> O <sub>4</sub> S <sub>1</sub> <sup>-</sup> | 231.07                 |
| 299.13                         | C <sub>15</sub> H <sub>23</sub> O <sub>4</sub> S <sub>1</sub> <sup>-</sup> | 299.13                 |
| 367.20                         | C <sub>20</sub> H <sub>31</sub> O <sub>4</sub> S <sub>1</sub> <sup>-</sup> | 367.19                 |
| 695.50                         | C <sub>44</sub> H <sub>71</sub> O <sub>4</sub> S <sub>1</sub> <sup>-</sup> | 695.51                 |
| 783.56                         | C <sub>56</sub> H <sub>79</sub> O <sub>2</sub> <sup>-</sup>                | 783.61                 |
| 786.57                         | C <sub>55</sub> H <sub>78</sub> O <sub>3</sub> <sup>-</sup>                | 786.59                 |
| 801.59                         | C <sub>56</sub> H <sub>81</sub> O <sub>3</sub> <sup>-</sup>                | 801.62                 |
| 881.61                         | C <sub>56</sub> H <sub>81</sub> O <sub>6</sub> S <sub>1</sub> <sup>-</sup> | 881.58                 |
