# Supplementary material
Source: PubMed Central journal article supplement (PMC2680727)

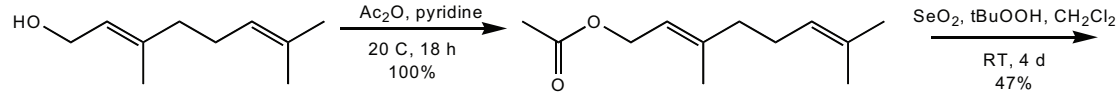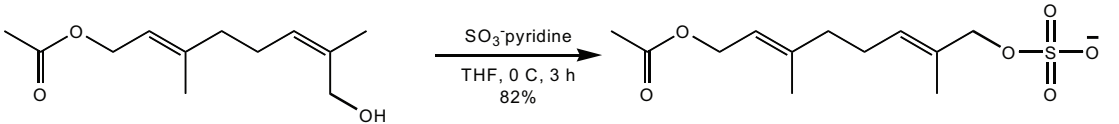

Supplement: NIHMS86390-supplement-2_si_002.pdf [file NIHMS86390-supplement-2_si_002.pdf]

**A**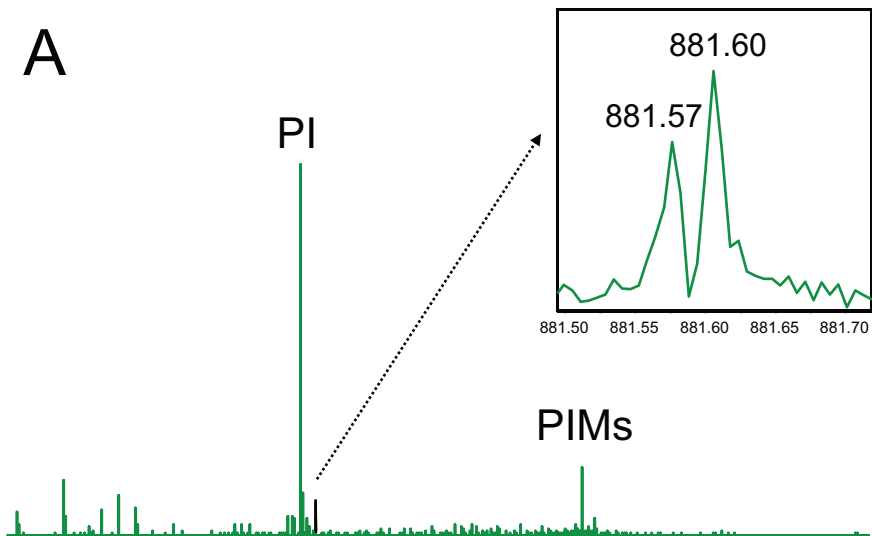**B**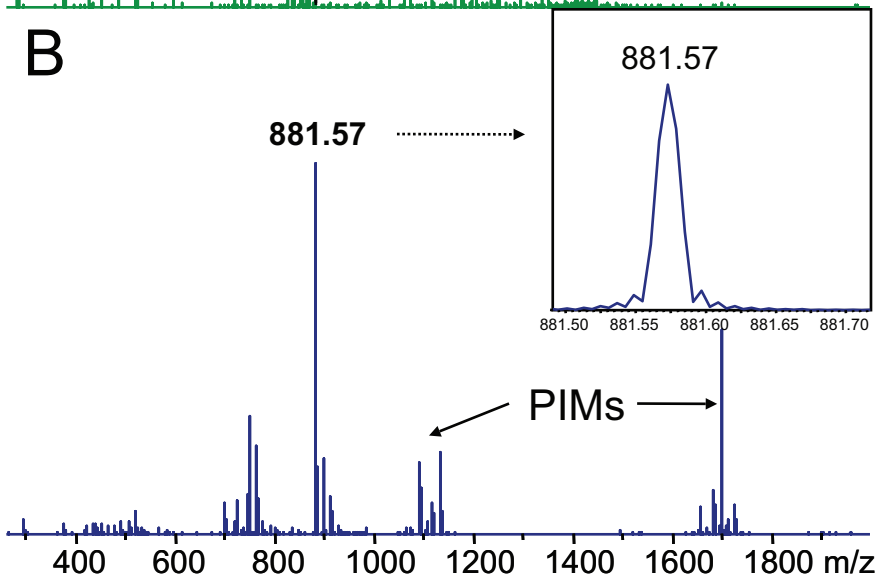

Supplement: NIHMS86390-supplement-3_si_003.pdf [file NIHMS86390-supplement-3_si_003.pdf]
